# Elevated Glycosylated Albumin in NIDDM Is a Function of Recent Everyday Environmental Stress

JAMES E. AIKENS, PHD  
RHONDA MAYES, MA

**OBJECTIVE** — To evaluate the association of recent daily environmental stress (daily hassles) with glycemia in NIDDM.

**RESEARCH DESIGN AND METHODS** — Fifty-five NIDDM patients reported the number and intensity of daily hassles occurring during the past week and concurrently underwent glycemic assessment.

**RESULTS** — Hassles were generally unassociated with demographic variables, illness duration, treatment regimen, and the presence of complications. Multiple regression analysis indicated that hassles (in both frequency and intensity) were positively associated with recent glycemia (glycosylated albumin [GA]), even after statistically controlling for long-term glycemia (glycosylated hemoglobin [HbA<sub>1c</sub>]). The subtypes of hassles having the most potent relationships with GA were work and family/friend-related stressors.

**CONCLUSIONS** — The frequency and perceived impact of everyday minor stress have proximal positive associations with glycemia that do not necessarily reflect chronic hyperglycemia. Stress arising from work and family/friend sources may be particularly relevant.

It has been suggested that psychological stress worsens NIDDM course by promoting hyperglycemia via sympathetically mediated gluconeogenesis and glycogenolysis (1,2). Stress hyperglycemia has been experimentally elicited in some (3,4) but not all studies (5–8). Although only one controlled trial has demonstrated improved NIDDM status after behavioral relaxation training (9), trials showing no overall effect suggest that baseline elevation in blood glucose (BG) (10), daily stress (11), and trait anxiety (12) may predict positive treatment response.

Stress hyperglycemia has also been studied by focusing on naturally occurring life stress. Although such studies are uncontrolled and do not allow clear causal inference, they may enhance stressor relevance by considering the idiosyncratic stressors occurring in the life of each par-

ticular subject. Thus, findings may be more generalizable to patients' typical environments. Grant et al. (13) found that "undesirable" major life events were associated with poor NIDDM functioning in 70% of patients; one third had stress-BG correlations exceeding  $r = 0.40$ . Bradley et al. (14) reported increased glycosuria episodes, medication adjustments, and diabetes clinic visits with increased major life stress. Although Griffith et al. detected no overall differences between stressed and unstressed subjects, high stress combined with low social support was associated with elevated glycosylated hemoglobin (HbA<sub>1c</sub>) (15).

While most naturalistic studies focus on major stressful events, minor events (also known as "daily hassles") may be even more critical, since in healthy populations they correlate with stress hormone metabolites (16) and are more predictive of health

status than are major stress events (17). Goetsch et al. (3) found that five out of six NIDDM patients studied had minor stress-BG correlations and that BG rose on high stress days (18). Jaber et al. (19) used a nine-item inventory to assess stress in 19 NIDDM patients on glipizide; stress correlated 0.70 with fasting BG and 0.84 with HbA<sub>1c</sub>.

These existing studies are limited by small samples and the lack of standardized well-validated stress measures. This study was designed to test the hypothesis that everyday minor stressors are associated with elevated NIDDM glycemia, using a larger sample and a standardized well-validated stress scale. To rule out the possibility that this relationship is an artifact of poor long-term diabetes control, long-term glycemia was also evaluated.

## RESEARCH DESIGN AND METHODS

### Subjects

Fifty-five subjects were recruited through the Primary Care and Endocrinology Clinics at a large urban U.S. medical center, using the following inclusion criteria: NIDDM of  $\leq 1$  year's duration, stable treatment regimen, and the ability to complete questionnaires independently. Sample characteristics are detailed in Table 1.

### Measures

**Daily stress.** Daily stress was measured with the revised Daily Hassles Scale (DHS), which lists 53 potentially stressful areas of everyday life. Test-retest reliability and validity are well documented (A. Delongis, unpublished observations; 21,22). Subjects rated "how much of a hassle" (on a four-point scale) each item was during the preceding week. The frequency (total number of hassles endorsed), intensity (mean of impact ratings), and eight factor scores (household responsibilities, finances, work, environment, home maintenance, health-related, personal life, and family/friends) were computed. Due to predictor-outcome confounding, the "health" item was omitted from the frequency and intensity scores.

From the Behavioral Medicine Service, Department of Psychiatry, University of Chicago, Chicago, Illinois.

Address correspondence and reprint requests to James E. Aikens, PhD, Behavioral Medicine Service, Department of Psychiatry, University of Chicago Hospitals, 5841 S. Maryland, MC-3077, Chicago, IL 60637-1470. E-mail: jaikens@yoda.bsd.uchicago.edu.

Received for publication 24 January 1997 and accepted in revised form 2 April 1997.

BG, blood glucose; DHS, Daily Hassles Scale; GA, glycosylated albumin.

Table 1—Sample characteristics and descriptive data

|                               | Mean $\pm$ SD   | Percentage |
|-------------------------------|-----------------|------------|
| Personal characteristics      |                 |            |
| Age (years)                   | 54.4 $\pm$ 14.4 |            |
| Sex (female)                  |                 | 58         |
| Ethnicity                     |                 |            |
| Caucasian                     |                 | 36         |
| African-American              |                 | 57         |
| Hispanic                      |                 | 6          |
| Asian/Pacific Islander        |                 | 2          |
| Native American               |                 | 0          |
| Medical characteristics       |                 |            |
| HbA <sub>1c</sub> (%)         | 10.6 $\pm$ 2.0  |            |
| GA (%)                        | 5.4 $\pm$ 5.3   |            |
| NIDDM regimen                 |                 |            |
| Diet alone                    |                 | 14         |
| Oral hypoglycemic agent       |                 | 18         |
| Insulin injection             |                 | 67         |
| Insulin pump                  |                 | 2          |
| NIDDM duration (years)        | 16.9 $\pm$ 11.5 |            |
| Comorbid illnesses            |                 |            |
| Hypertension                  |                 | 49         |
| Cardiac condition             |                 | 24         |
| Hyperlipidemia                |                 | 22         |
| Complications                 |                 |            |
| Retinopathy                   |                 | 35         |
| Neuropathy                    |                 | 23         |
| Renal disease                 |                 | 15         |
| Psychological characteristics |                 |            |
| Daily hassles frequency       | 16.2 $\pm$ 11.5 |            |
| Daily hassles intensity       | 0.78 $\pm$ 0.40 |            |

Data are means  $\pm$  SD or %.

**Glycemia.** Long-term glycemia was assessed with HbA<sub>1c</sub> (boronate affinity high-performance liquid chromatography method). Recent glycemia was assessed by enzyme immunoassay method with glycosylated albumin (GA), a measure of glycosylated protein distinguished from the HbA family by its shorter half-life. Because it assesses average blood glucose over a brief time period of 7–10 days, it is sensitive to the short-term glycemic level and corre-

sponds to the 1-week time frame assessed by the DHS (23).

#### Procedure

Subjects provided written informed consent according to Internal Review Board-approved protocol. During a research appointment at the Clinical Research Center, each patient independently completed the DHS immediately before providing morning (~7:30 A.M.) fasting blood sam-

ples for GA and HbA<sub>1c</sub>.

**RESULTS** — Daily hassles frequency and intensity fell within 1.5 standard deviations of normative values previously reported for adult subjects of similar ages (18). Ranked scores were computed for DHS and GA, since these variables had positively skewed distributions. DHS intensity was positively associated with GA but not with HbA<sub>1c</sub>, age, illness duration, NIDDM regimen (diet alone versus medication), or the presence of any particular complication (see Table 2). DHS frequency also correlated with GA and NIDDM duration but not with medical or demographic characteristics.

Multiple regression analysis was then used to test the hypothesis that recent glycemia is a function of hassles after accounting for chronic glycemia. GA served as the dependent variable, HbA<sub>1c</sub> was entered first as a covariate, and the hassles level was entered last. As predicted, DHS intensity had a significant effect on GA (regression coefficient  $\beta$  = 0.31,  $P$  < 0.05), while HbA<sub>1c</sub> did not ( $\beta$  = 0.09, NS). The same pattern was seen for DHS frequency ( $\beta$  = 0.36,  $P$  < 0.05). To examine whether the effect occurred for patients below our relatively high mean HbA<sub>1c</sub>, we reran the regression for subjects with HbA<sub>1c</sub> < 10.6%, but the DHS effect remained. Further, this effect did not seem to be attributable to differences in medication taking, since DHS scores were unassociated with subjects' ratings of their medication adherence ( $r$  = 0.05, NS). Subsequent correlational analysis explored which of the eight hassles subtypes correlated with GA; significant associations emerged for hassles related to work ( $r$  = 0.43,  $P$  < 0.01) and family/friends ( $r$  = 0.31,  $P$  < 0.05); no hassles factors correlated with HbA<sub>1c</sub>. There were no differences in DHS total or factor scores between Caucasians and ethnic minorities (all  $t$  values  $\leq$  |1.92|; all two-tailed  $P$  values = NS).

Table 2—Zero-order correlations

|                         | Age    | NIDDM duration | GA    | HbA <sub>1c</sub> | Hassles frequency | Hassles intensity |
|-------------------------|--------|----------------|-------|-------------------|-------------------|-------------------|
| Age                     | 1.00   | —              | —     | —                 | —                 | —                 |
| NIDDM duration          | -0.10  | 1.00           | —     | —                 | —                 | —                 |
| Glycosylated albumin    | -0.34* | -0.50†         | 1.00  | —                 | —                 | —                 |
| Glycosylated hemoglobin | -0.13  | 0.11           | -0.09 | 1.00              | —                 | —                 |
| Hassles frequency       | 0.14   | -0.38†         | 0.33* | -0.19             | 1.00              | —                 |
| Hassles intensity       | -0.16  | -0.18          | 0.31* | -0.10             | 0.91†             | 1.00              |

\* $P$  < 0.05; † $P$  < 0.01.

**CONCLUSIONS** — The positive daily hassles–GA association suggests that it may be possible for typical everyday stressors to produce transient elevations in NIDDM glycemia. As predicted, recent daily hassles were uncorrelated with long-term glycemia ( $HbA_{1c}$ ), and the hassles–GA association persisted even when  $HbA_{1c}$  was controlled for statistically. This pattern suggests that the proximal stress–GA association is not simply a byproduct of chronically poor metabolic control. The subtypes of hassles having the most potent relationships with GA were work and family/friend-related stressors.

These results lend further support to earlier studies by using a larger sample and a well-validated stress measure. Nonetheless, correlational data cannot be interpreted as firm evidence of stress-induced hyperglycemia, particularly given the difficulty in experimentally demonstrating this phenomenon. One interpretation of this disparity is that life stress arising from work- and family-related stressors is more personally relevant (and therefore more potent) than standardized mental arithmetic stress. Yet, reasonable alternative explanations also exist. Elevated glucose itself may have direct aversive mood effects (24) or may cause patients to feel helpless about controlling their illness. An unmeasured medical factor (e.g., infection) may affect glycemia, or stress may disrupt the performance of self-care tasks such as meal preparation and BG testing.

Future work ought to attempt to test for a long-term stress–glycemia association by sampling stress throughout the  $HbA_{1c}$  time frame, a methodology that has been successfully applied in IDDM (25). Other limitations of this study and areas for future work are the consideration of diabetes-specific everyday stressors (5), depressive disorder (26), social support (15), and the coping responses elicited by everyday stressors.

**Acknowledgments** — This study was completed with assistance from the University of Chicago Clinical Research Center Chicago (USPHS MO1 RR00055) and a Home Health Care grant from the University of Chicago. Louis

Philipson, MD, PhD, provided helpful consultation on endocrinological assays. Theresa Kiobasa assisted with data collection.

## References

1. Evans M: Emotional stress and diabetic control: a postulated model for the effect of emotional distress upon intermediary metabolism in the diabetic. *Biofeedback Self Regul* 10:241–254, 1985
2. Surwit RS, Feinglos MN: Stress and diabetes. *Behavioral Medicine Update* 6:8–11, 1984
3. Goetsch VL, Wiebe DJ, Veltum LG, VanDorsten B: Stress and blood glucose in type II diabetes mellitus. *Behav Res Ther* 28:531–537, 1990
4. Goetsch VL, VanDorsten B, Pbert LA, Ullrich IH, Yeater RA: Acute effects of laboratory stress on blood glucose in non-insulin dependent diabetes mellitus. *Psychosom Med* 55:492–496, 1993
5. Cox DJ, Gonder-Frederick L: Major developments in behavioral diabetes research. *J Consult Clin Psychol* 60:628–638, 1992
6. Naliboff BD, Cohen MJ, Sowers JD: Physiological and metabolic responses to brief stress in non-insulin dependent diabetic and control subjects. *J Psychosom Res* 29:367–374, 1985
7. Bruce DG, Chisholm DJ, Storlien LH, Kraegen EW, Smythe GA: The effects of sympathetic nervous system activation and psychological stress on glucose metabolism and blood pressure in subjects with type II non-insulin-dependent diabetes mellitus. *Diabetologia* 35:835–843, 1992
8. Bruce DG, Chisholm DJ, Storlien LH, Smythe GA, Kragen EW: Acute psychological stress does not cause hyperglycemia in non insulin dependent diabetes mellitus despite an increased sensitivity to sympathomimetic agents. *Diabetes Educ* 14:229, 1988
9. Surwit RS, Feinglos MN: The effects of relaxation on glucose tolerance on non-insulin dependent diabetes. *Diabetes Care* 6:176–179, 1983
10. Lammers CA, Naliboff BD, Straatmeyer AJ: The effects of progressive muscle relaxation on stress and diabetic control. *Behav Res Ther* 22:641–650, 1984
11. Bradley C, Moses JL, Gamsu DS, Knight G, Ward JD: The effects of relaxation on metabolic control of type I diabetes: a matched controlled study (Abstract). *Diabetes* 34:17A, 1985
12. Lane JD, McCaskill CC, Ross SL, Feinglos MN, Surwit RS: Relaxation training for NIDDM: predicting who may benefit. *Diabetes Care* 16:1087–1094, 1993
13. Grant I, Kyle GC, Teichman A, Mendels J: Recent life events and diabetes in adults. *Psychosom Med* 36:121–128, 1974
14. Bradley C: Life events and the control of diabetes mellitus. *J Psychosom Res* 23:159–162, 1979
15. Griffith LS, Field BJ, Lustman PJ: Life stress and social support in diabetes: association with glycemic control. *Int J Psych Med* 20:365–372, 1990
16. Brantley PJ, Dietz LS, McKnight G, Jones GN, Tulley R: Convergence between the daily stress inventory and endocrine measures of stress. *J Consult Clin Psychol* 56:549–551, 1988
17. Kanner AD, Coyne JC, Schafer C, Lazarus RS: Comparison of two modes of stress measurement: daily hassles and uplifts versus major life events. *J Behav Med* 4:1–23, 1981
18. Goetsch VL, Abel JL, Pope MK: The effects of stress, mood and coping on blood glucose in NIDDM: a prospective pilot investigation. *Behav Res Ther* 32:503–510, 1994
19. Jaber LA, Lewis NJW, Slaughter RL, Neale AV: The effects of stress on glycemic control in patients with type II diabetes during glyburide and glipizide therapy. *J Clin Pharmacol* 32:239–245, 1992
20. Delongis A, Folkman S, Lazarus RS: The impact of daily stress on health and mood: psychological and social resources as mediators. *J Pers Soc Psychol* 54:486–495, 1988
21. Folkman S, Lazarus RS, Pimley S, Novacek J: Age differences in stress and coping processes. *Psychol Aging* 2:171–184, 1987
22. Service FJ, O'Brien PC, Rizza RA: Measurements of glucose control. *Diabetes Care* 10:225–237, 1987
23. Gonder-Frederick LA, Cox DJ, Bobbitt SA, Pennebaker JW: Mood changes associated with blood glucose fluctuations in insulin dependent diabetes mellitus. *Health Psychol* 8:45–59, 1989
24. Aikens JE, Wallander JL, Bell DSH, Cole JA: Daily stress variability, learned resourcefulness, regimen adherence, and metabolic control in type I diabetes mellitus: evaluation of a path model. *J Consult Clin Psychol* 60:113–118, 1992
25. Lustman PJ, Griffith LS, Clouse RE, Cryer PE: Psychiatric illness in diabetes mellitus: relationship to symptoms and illness control. *J Nerv Ment Dis* 174:736–742, 1986
